# Supplementary material
Source: publisher figshare collection journal article supplement (https://karger.figshare.com/ndownloader/files/27569024)
Supplement: Supplementary file 1 [file 27569024]

Supplemental Figure 1: Representative dot plots and histograms summarizing the gating strategy and reporting the change in FSC and SSC. (A) Doublet discrimination was performed by gating FSC-H vs. FSC-A. (B) Neutrophils were identified by their SSC-A and FSC-A properties. (C) – (E) After 10 min of stimulation with IL-8 (50 ng/ml), neutrophils respond with a homogenous increase in FSC and SSC in comparison to unstimulated cells (white overlay = Ctrl, blue = stimulated neutrophils).
